# Supplementary material for: nNOS-expressing interneurons control basal and behaviorally evoked arterial dilation in somatosensory cortex of mice
Source: eLife journal article supplement (doi:10.7554/elife.60533), 2020-10-05

Figure 5 - Figure Supplement 2

ACSF LFP

BaCl<sub>2</sub> LFP

A

locomotion

## Broadband LFP (1-100Hz)

2V

2V

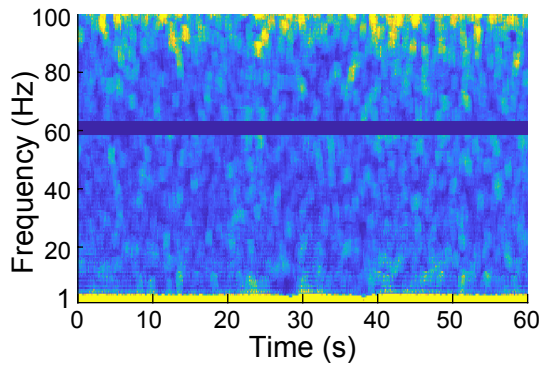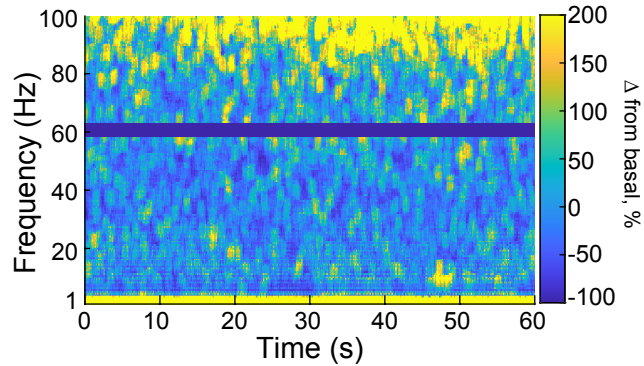

B

### BaCl<sub>2</sub> Power Spectral Density

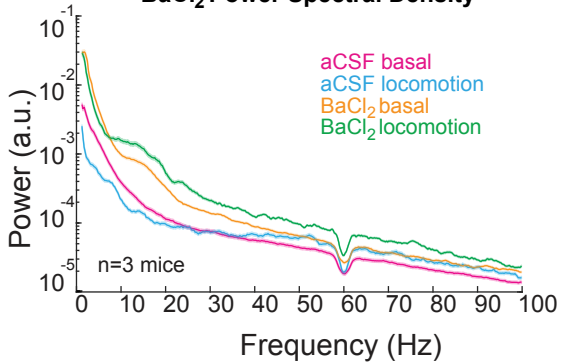

C

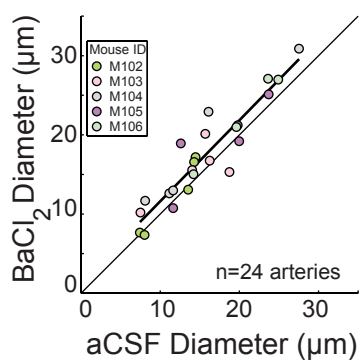

D

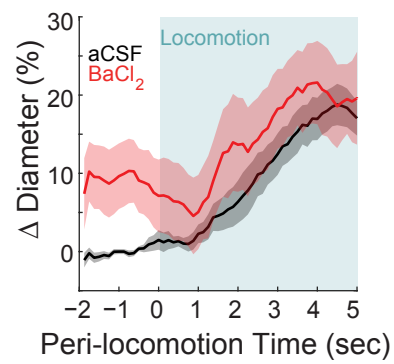

E

### ML-133 Power Spectral Density

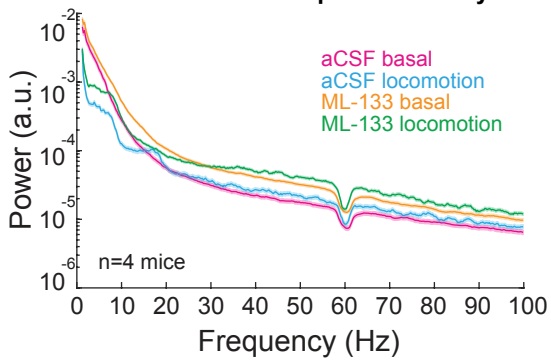

F

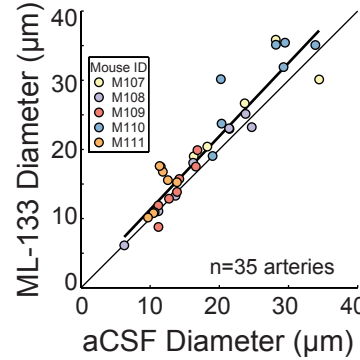

# G

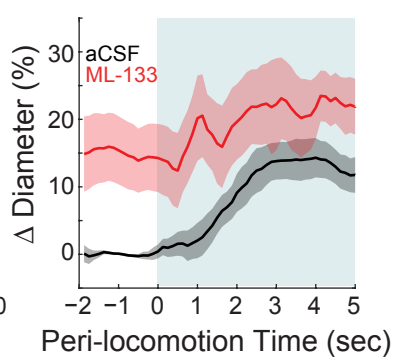

Supplement: supp [file elife_poa_e60533_Figure_5_figure_supplement_2.pdf › elife_poa_e60533_Figure_5_figure_supplement_2.pdf]
