# Supplementary figures and images for: nNOS-expressing interneurons control basal and behaviorally evoked arterial dilation in somatosensory cortex of mice
Source: eLife journal article supplement (doi:10.7554/elife.60533), 2020-10-05

Figure 1- Figure Supplement 1

A

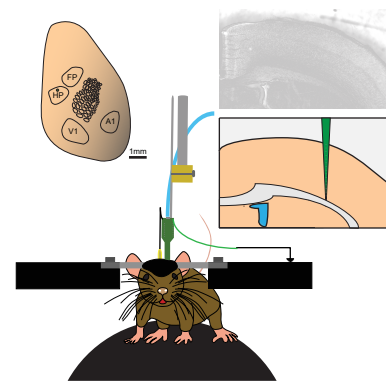

B

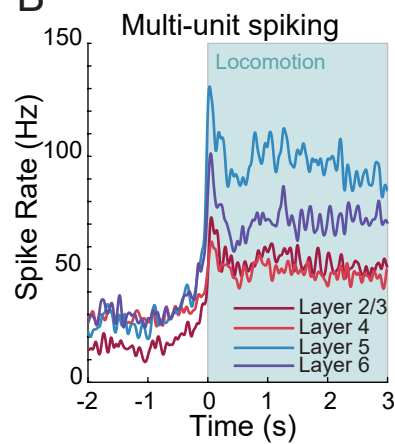

C

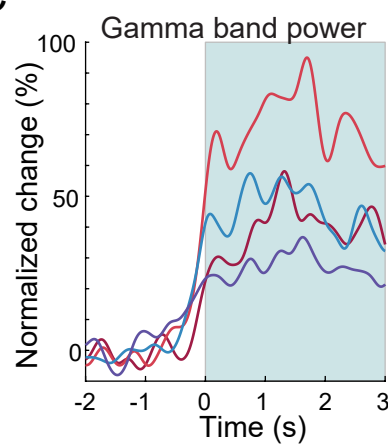

D

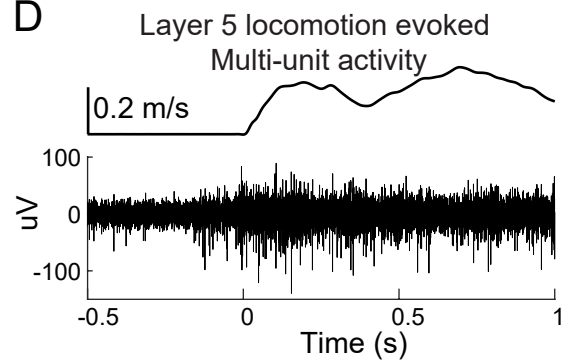

E

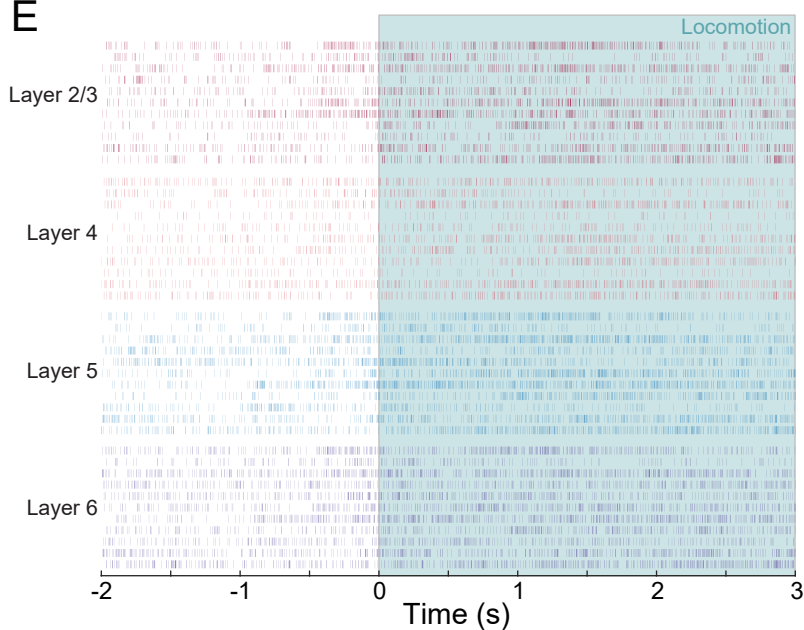

Supplement: supp [file elife_poa_e60533_Figure_1_figure_supplement_1.pdf › elife_poa_e60533_Figure_1_figure_supplement_1.pdf]

Figure 1 - Figure Supplement 2

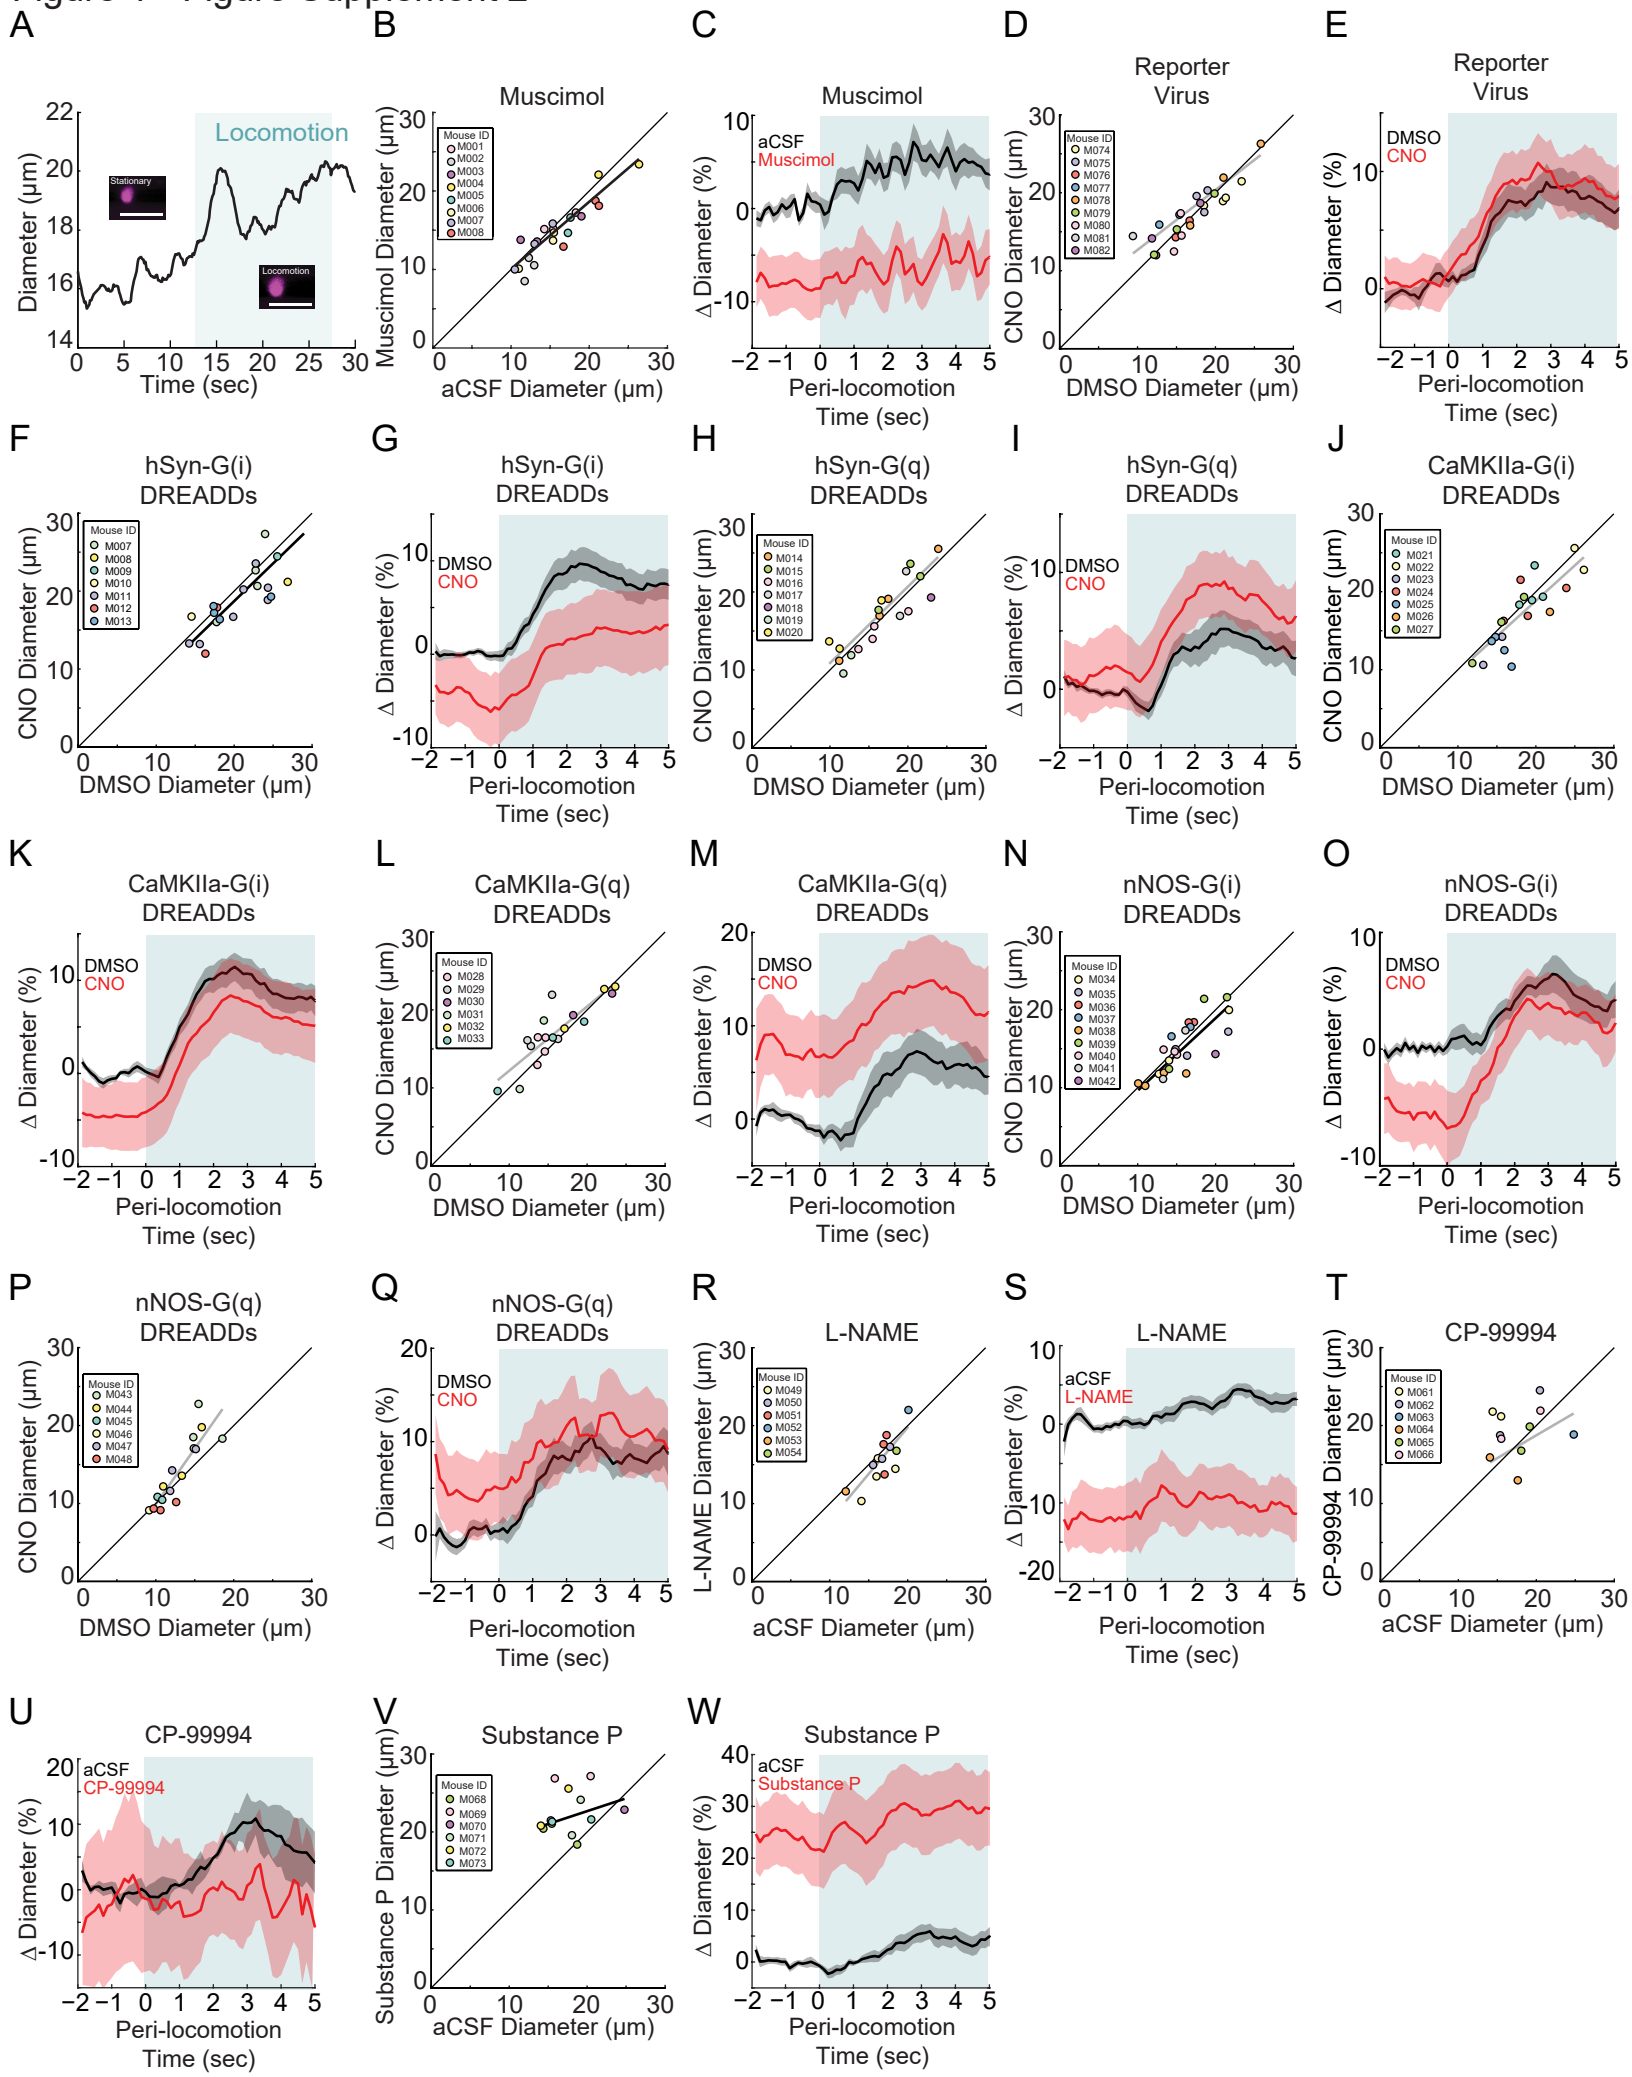

Supplement: supp [file elife_poa_e60533_Figure_1_figure_supplement_2.pdf › elife_poa_e60533_Figure_1_figure_supplement_2.pdf]

Figure 1- Figure Supplement 3

A

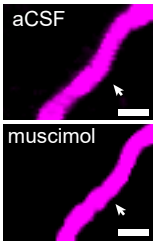

B

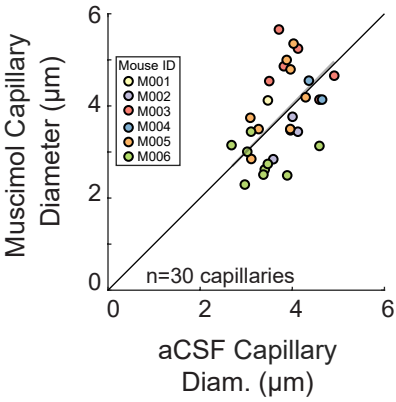

Supplement: supp [file elife_poa_e60533_Figure_1_figure_supplement_3.pdf › elife_poa_e60533_Figure_1_figure_supplement_3.pdf]

Figure 1 - Figure Supplement 4

A

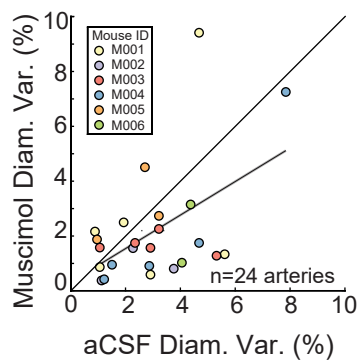

B

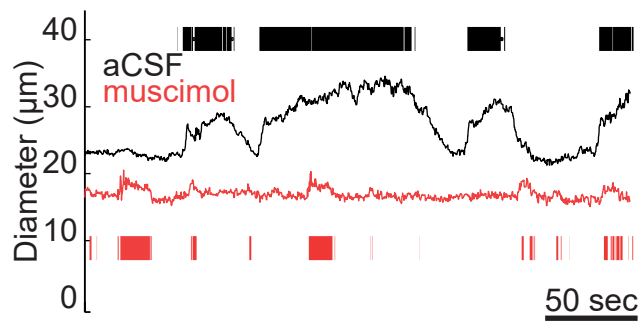

Supplement: supp [file elife_poa_e60533_Figure_1_figure_supplement_4.pdf › elife_poa_e60533_Figure_1_figure_supplement_4.pdf]

Figure 1- Figure Supplement 5

A

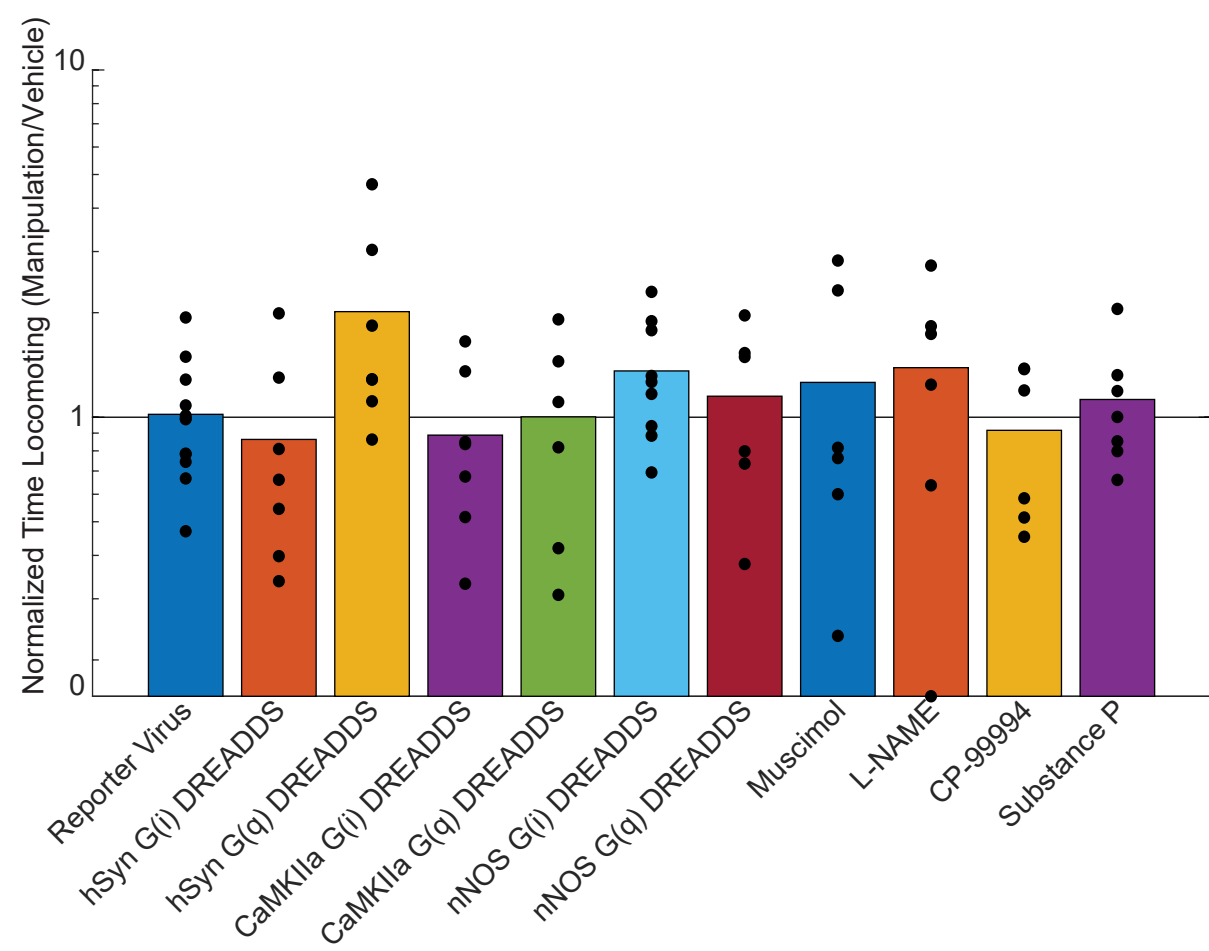

Supplement: supp [file elife_poa_e60533_Figure_1_figure_supplement_5.pdf › elife_poa_e60533_Figure_1_figure_supplement_5.pdf]

Figure 2 - Figure Supplement 1

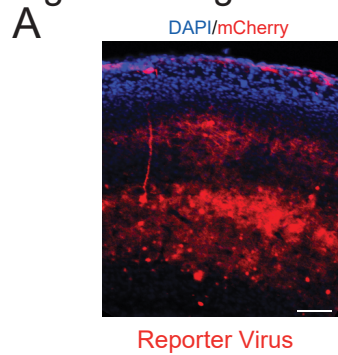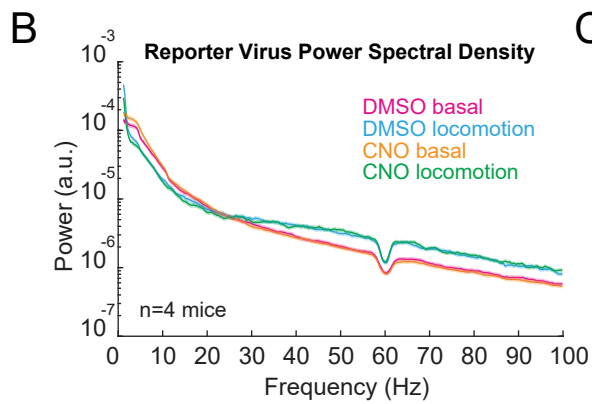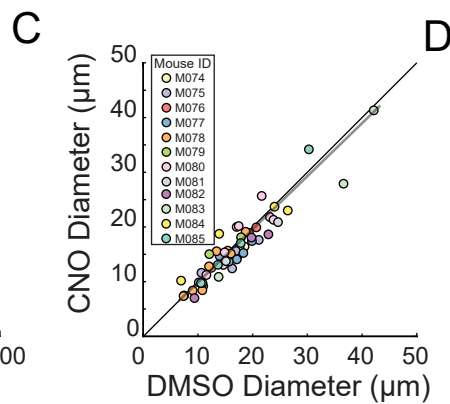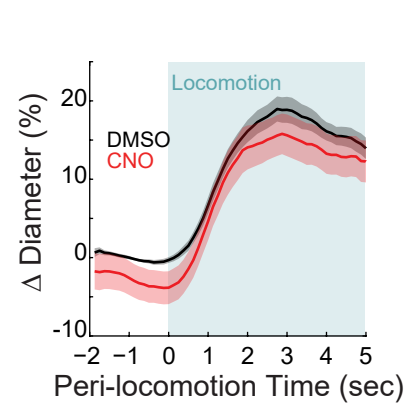

Supplement: supp [file elife_poa_e60533_Figure_2_figure_supplement_1.pdf › elife_poa_e60533_Figure_2_figure_supplement_1.pdf]

Figure 2 - Figure Supplement 2

A

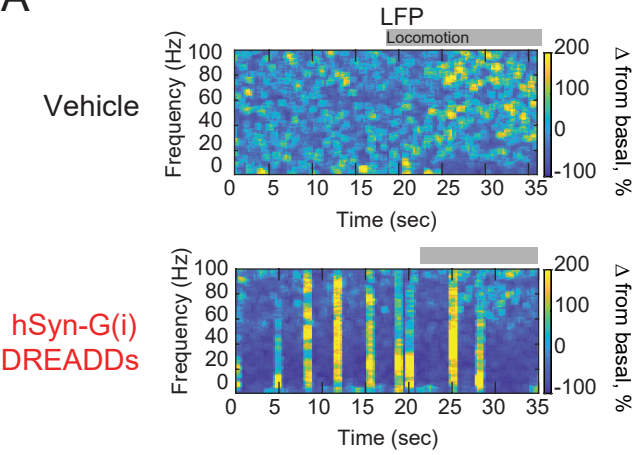

B

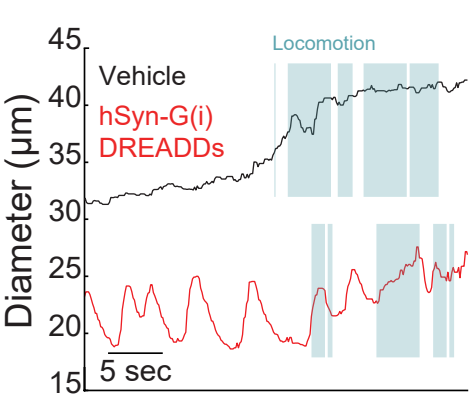

Supplement: supp [file elife_poa_e60533_Figure_2_figure_supplement_2.pdf › elife_poa_e60533_Figure_2_figure_supplement_2.pdf]

Figure 4 - Figure Supplement 1

A

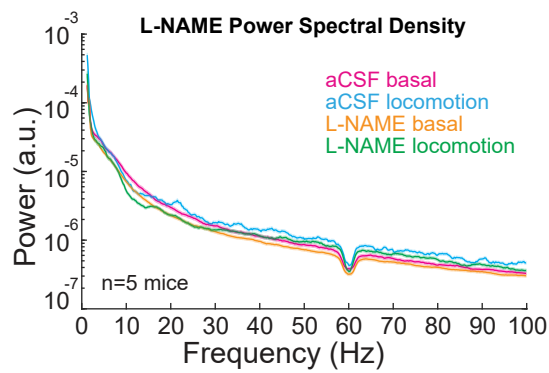

B

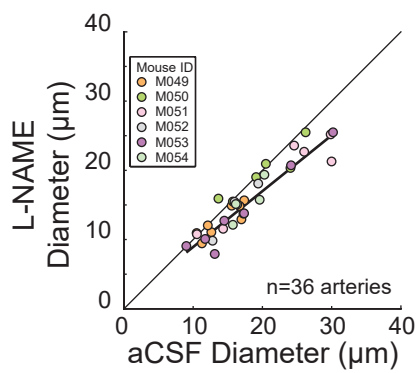

C

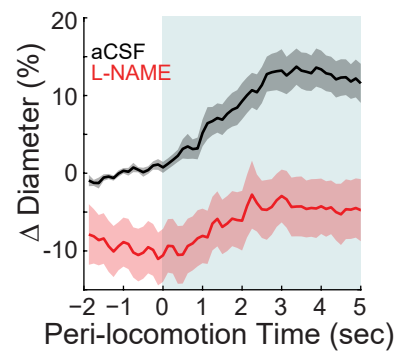

D

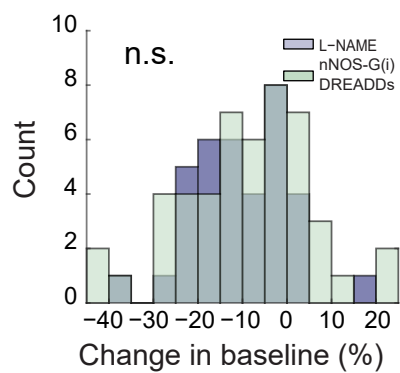

Supplement: supp [file elife_poa_e60533_Figure_4_figure_supplement_1.pdf › elife_poa_e60533_Figure_4_figure_supplement_1.pdf]

Figure 5 - Figure Supplement 1

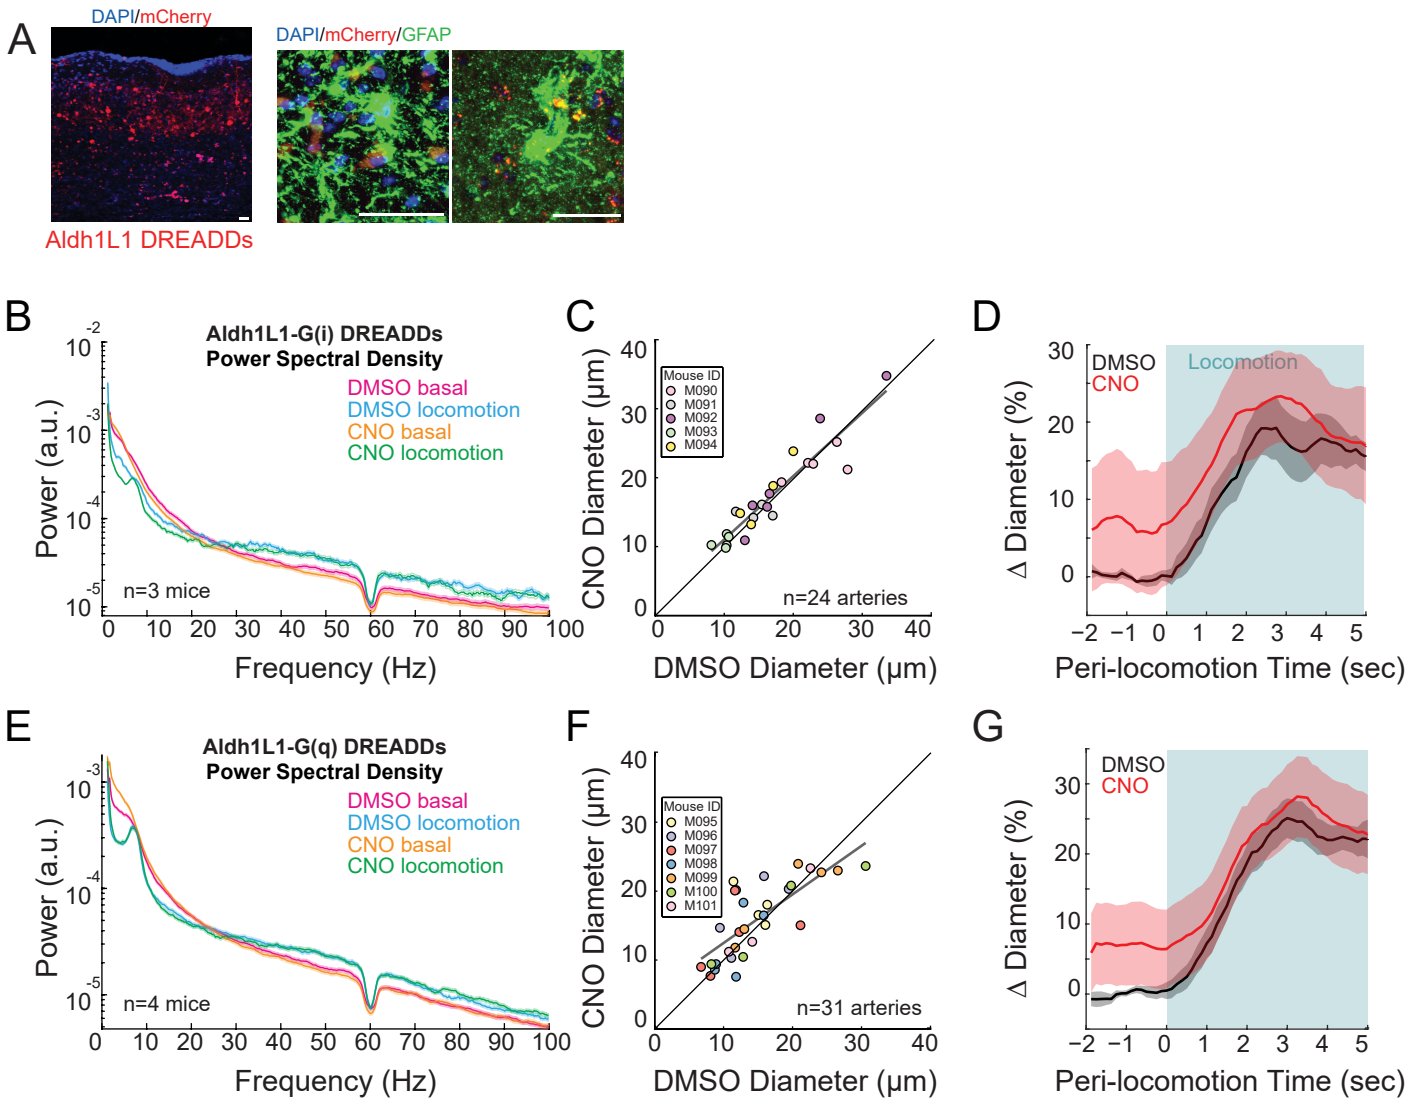

Supplement: supp [file elife_poa_e60533_Figure_5_figure_supplement_1.pdf › elife_poa_e60533_Figure_5_figure_supplement_1.pdf]

Figure 6 - Figure Supplement 1

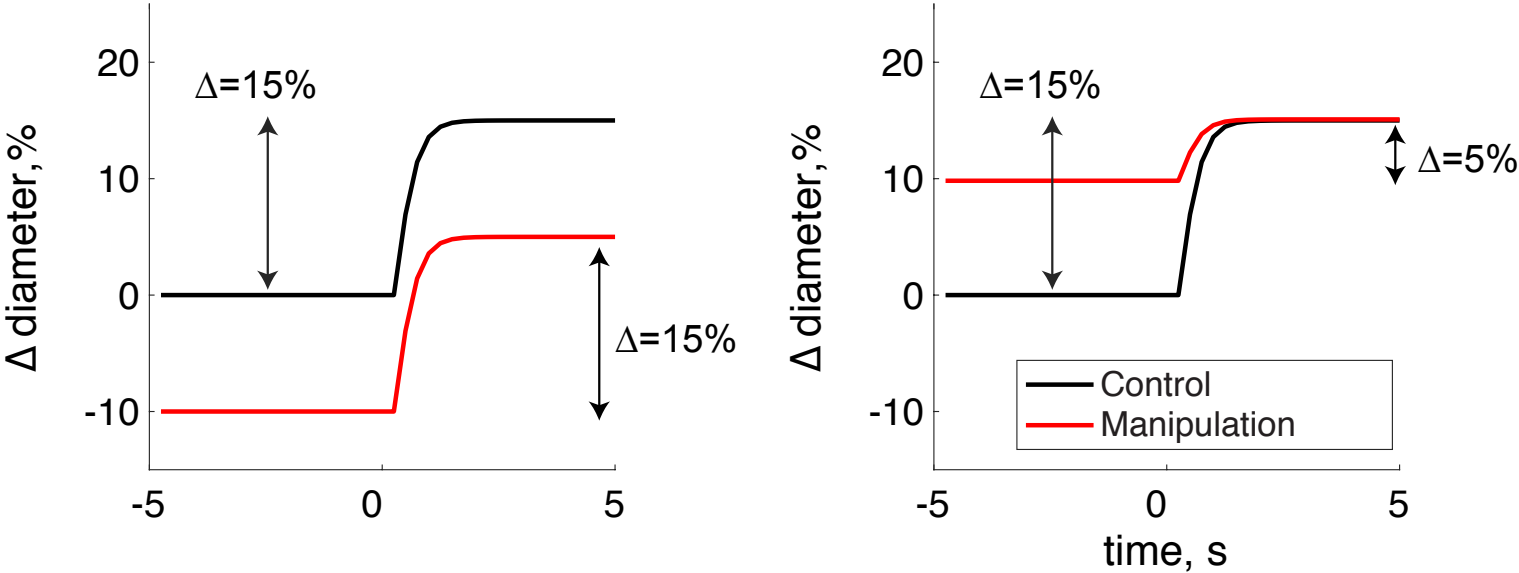

Supplement: supp [file elife_poa_e60533_Figure_6_figure_supplement_1.pdf › elife_poa_e60533_Figure_6_figure_supplement_1.pdf]

Figure 6 - Figure Supplement 2

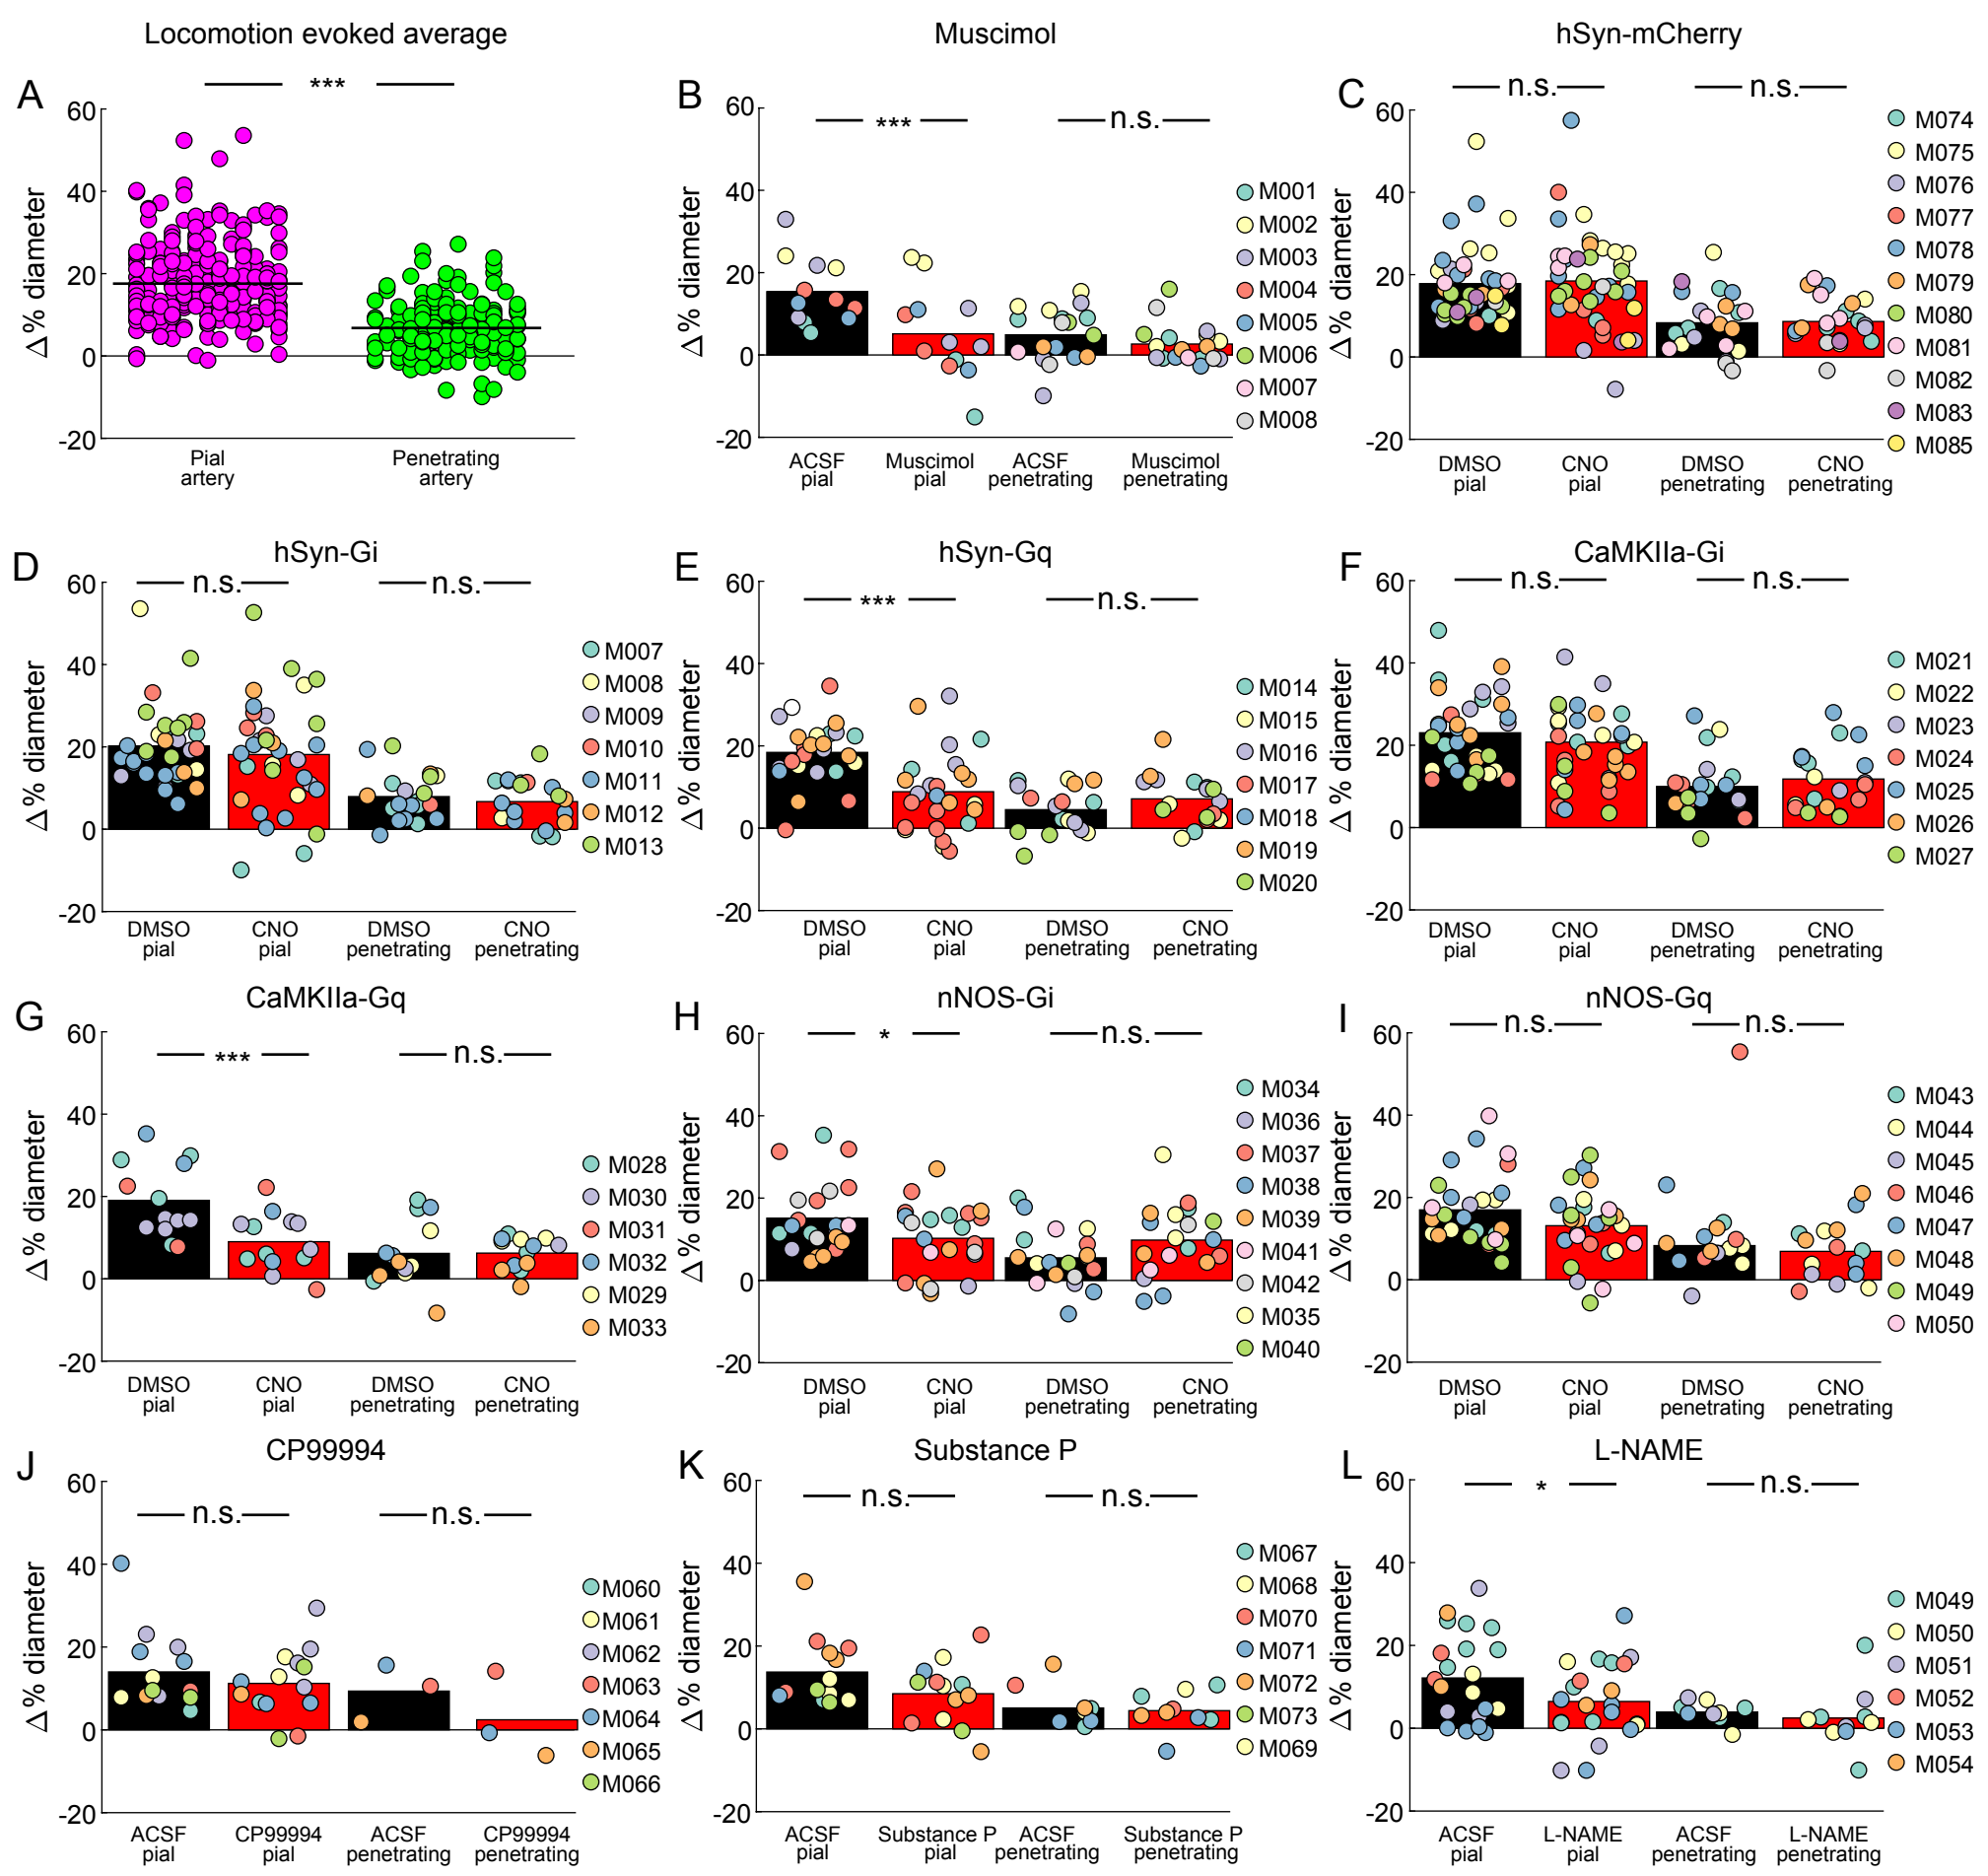

Supplement: supp [file elife_poa_e60533_Figure_6_figure_supplement_2.pdf › elife_poa_e60533_Figure_6_figure_supplement_2.pdf]

Figure 7 - Figure Supplement 1

A

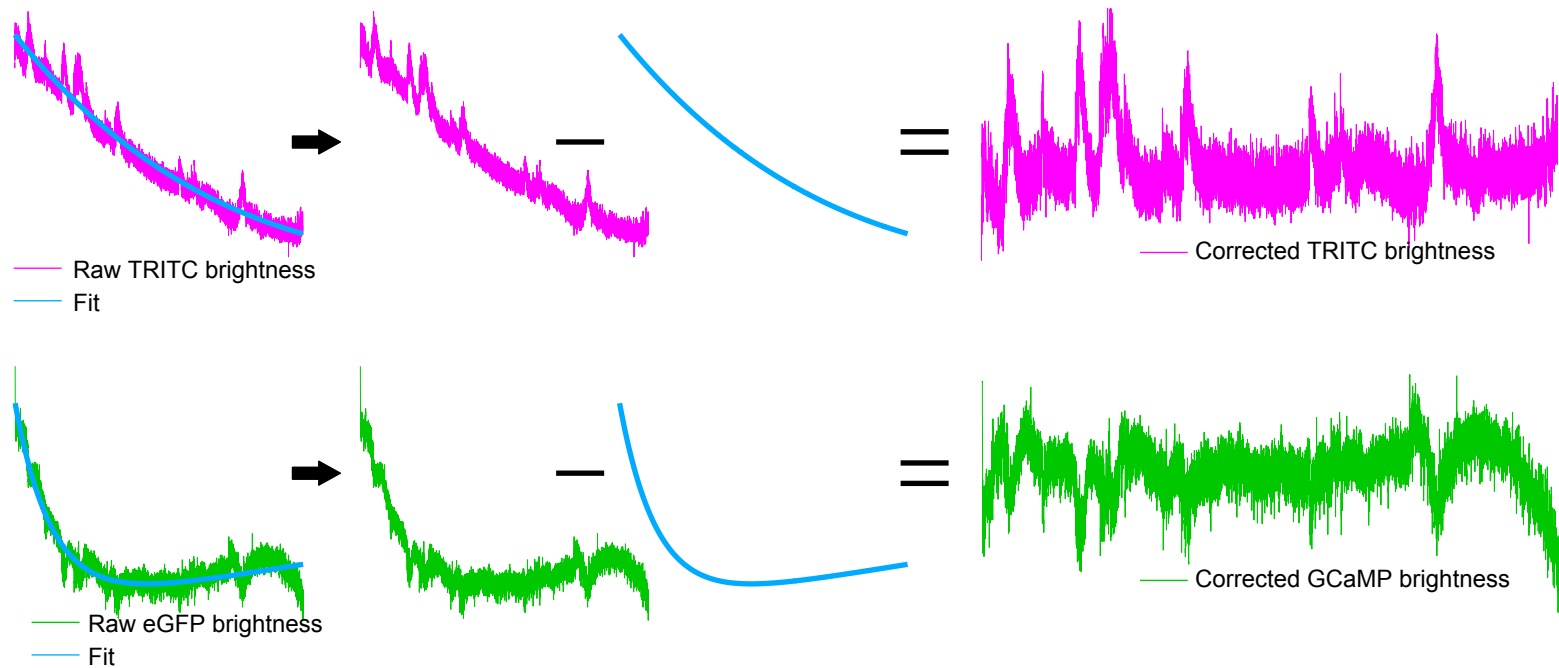

B

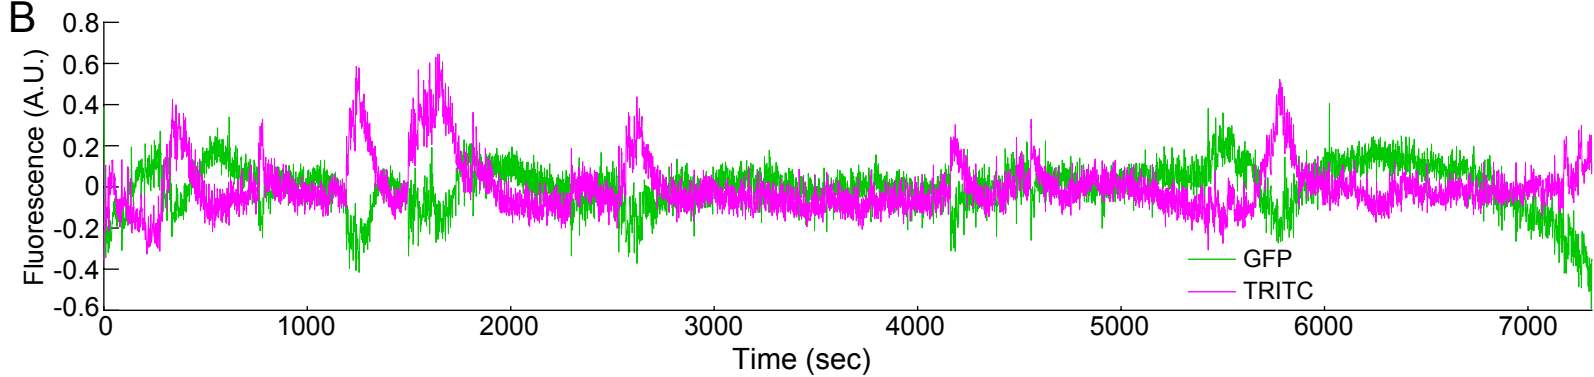

C

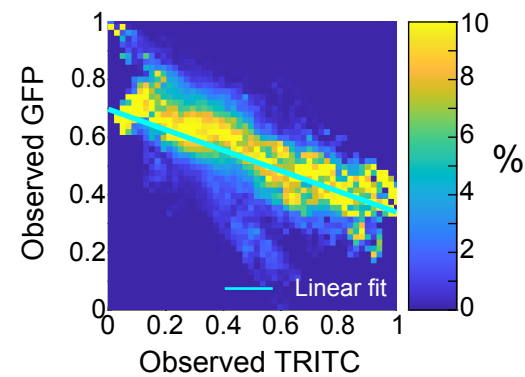

D

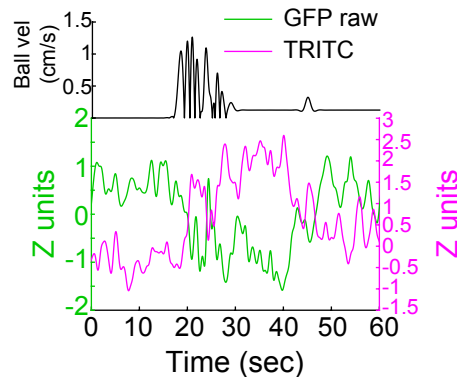

E

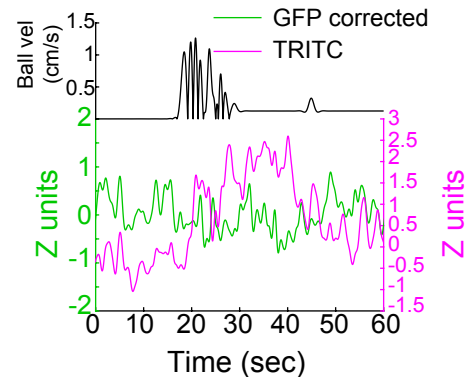

Supplement: supp [file elife_poa_e60533_Figure_7_figure_supplement_1.pdf › elife_poa_e60533_Figure_7_figure_supplement_1.pdf]

# Figure 7 - Figure Supplement 2

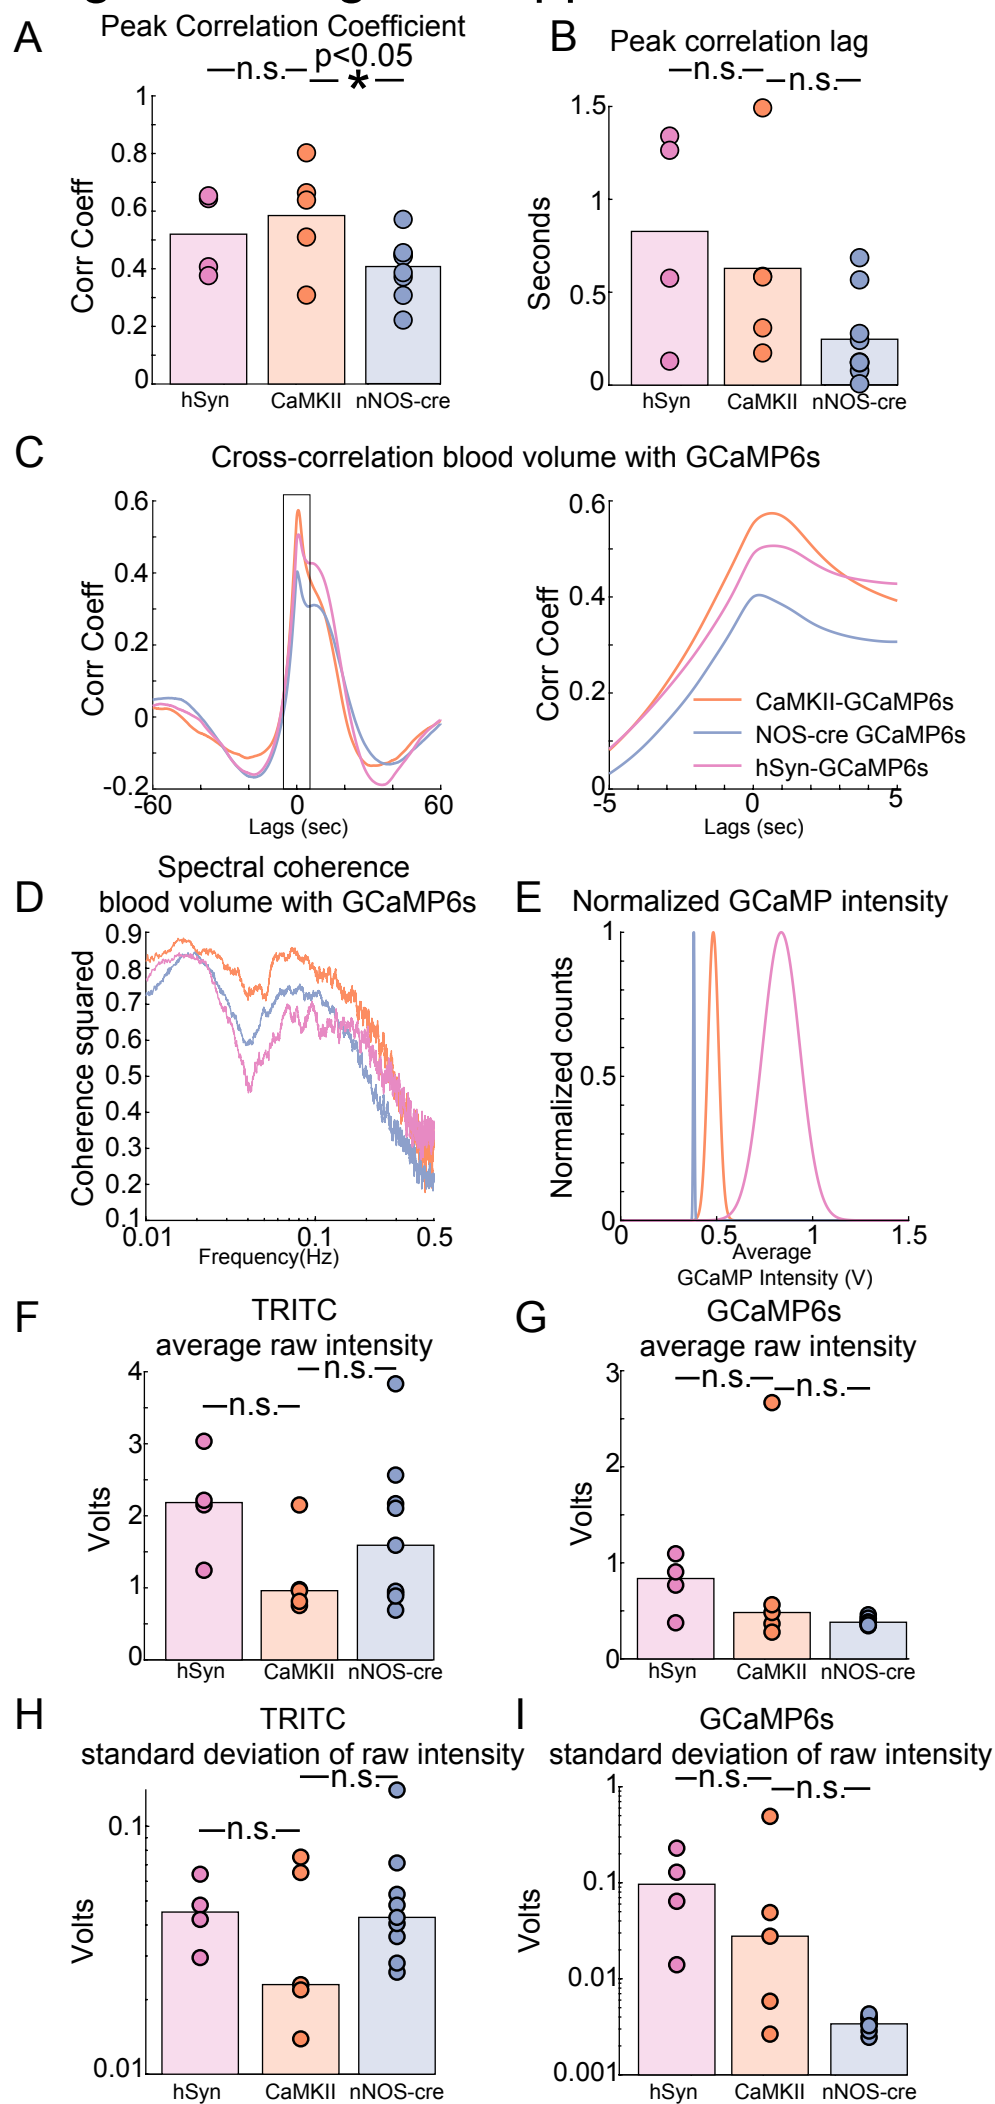

Supplement: supp [file elife_poa_e60533_Figure_7_figure_supplement_2.pdf › elife_poa_e60533_Figure_7_figure_supplement_2.pdf]

# Figure 7 - Figure Supplement 3

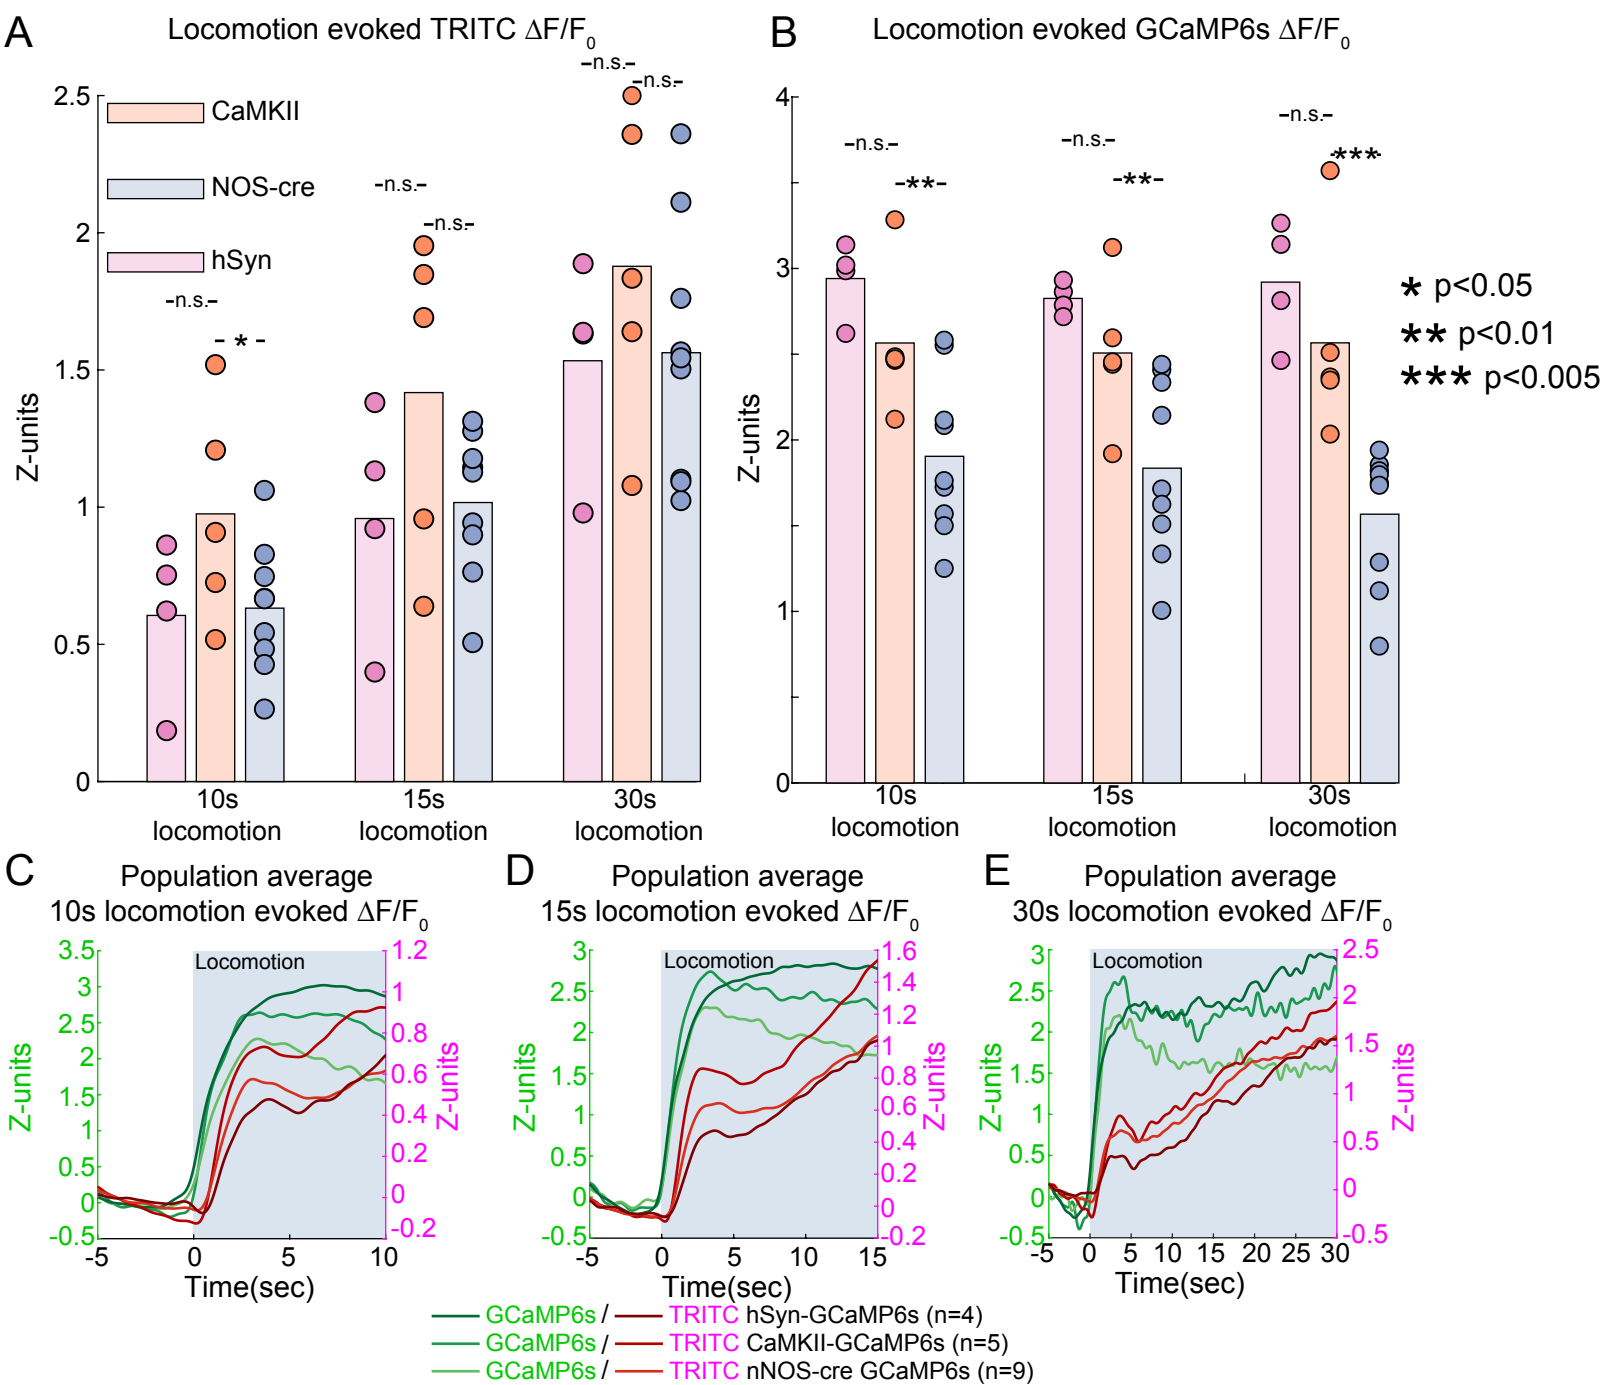

Supplement: supp [file elife_poa_e60533_Figure_7_figure_supplement_3.pdf › elife_poa_e60533_Figure_7_figure_supplement_3.pdf]

Figure 8 - Figure Supplement 1

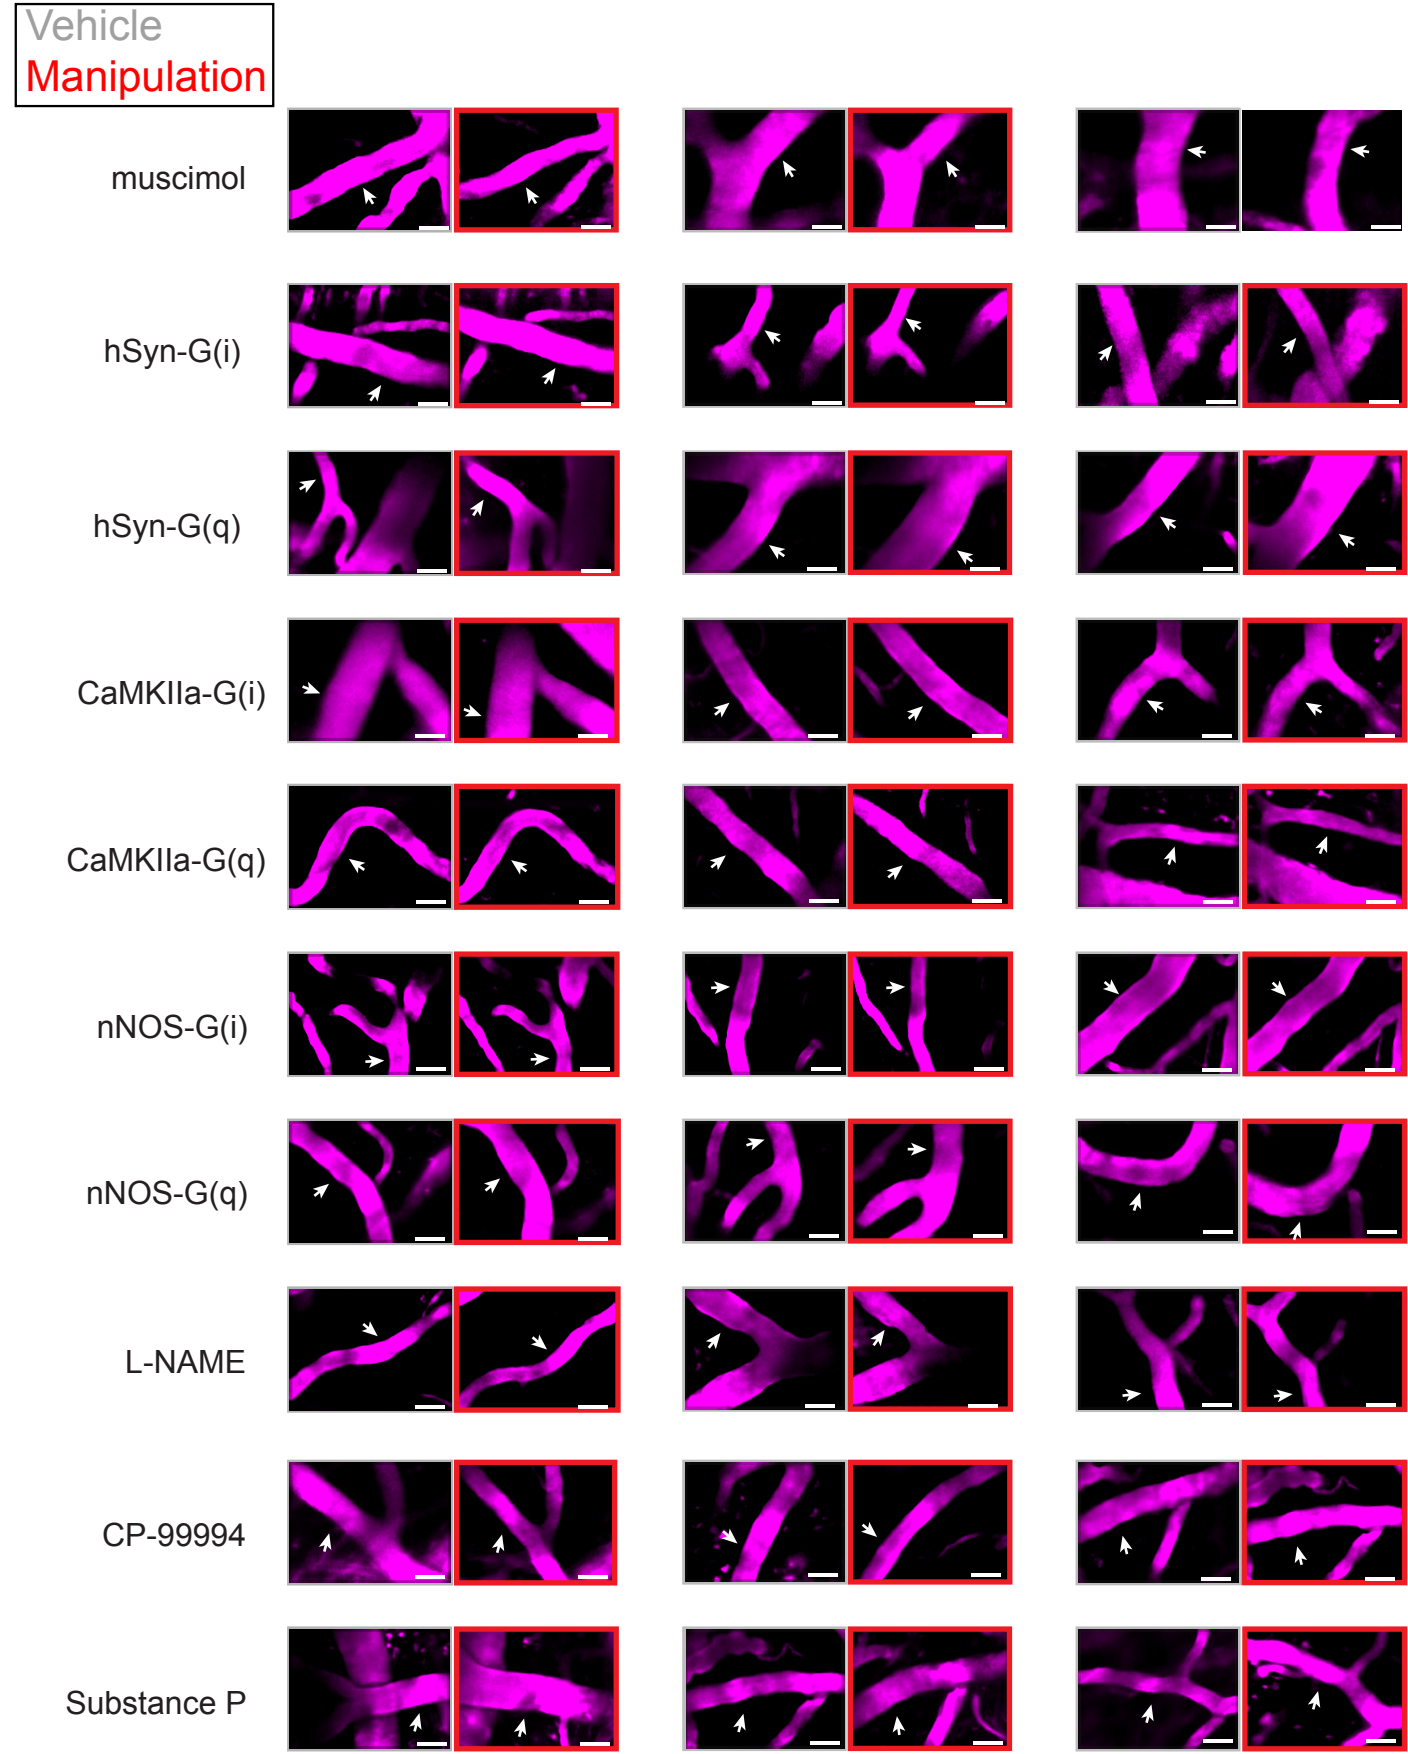

Supplement: supp [file elife_poa_e60533_Figure_8_figure_supplement_1.pdf › elife_poa_e60533_Figure_8_figure_supplement_1.pdf]

Figure 8 - Figure Supplement 2

A

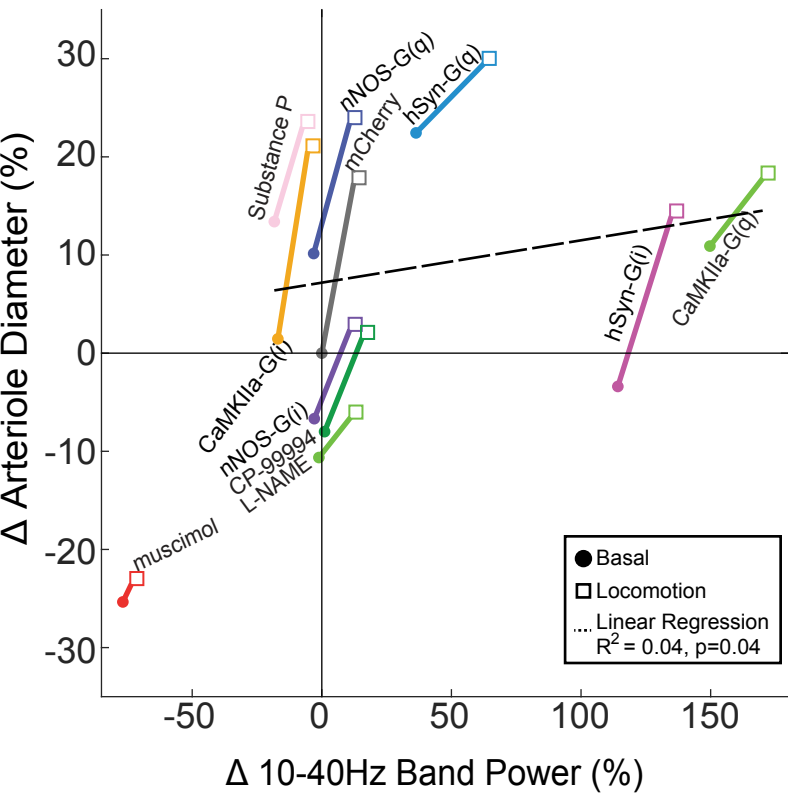

B

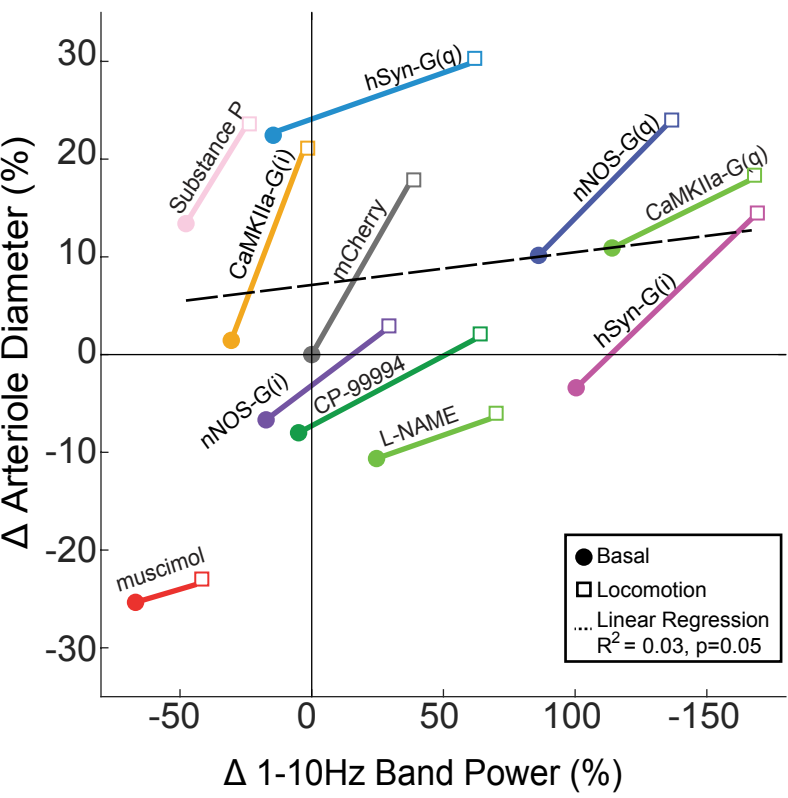

Supplement: supp [file elife_poa_e60533_Figure_8_figure_supplement_2.pdf › elife_poa_e60533_Figure_8_figure_supplement_2.pdf]

Figure 8 - Figure Supplement 3

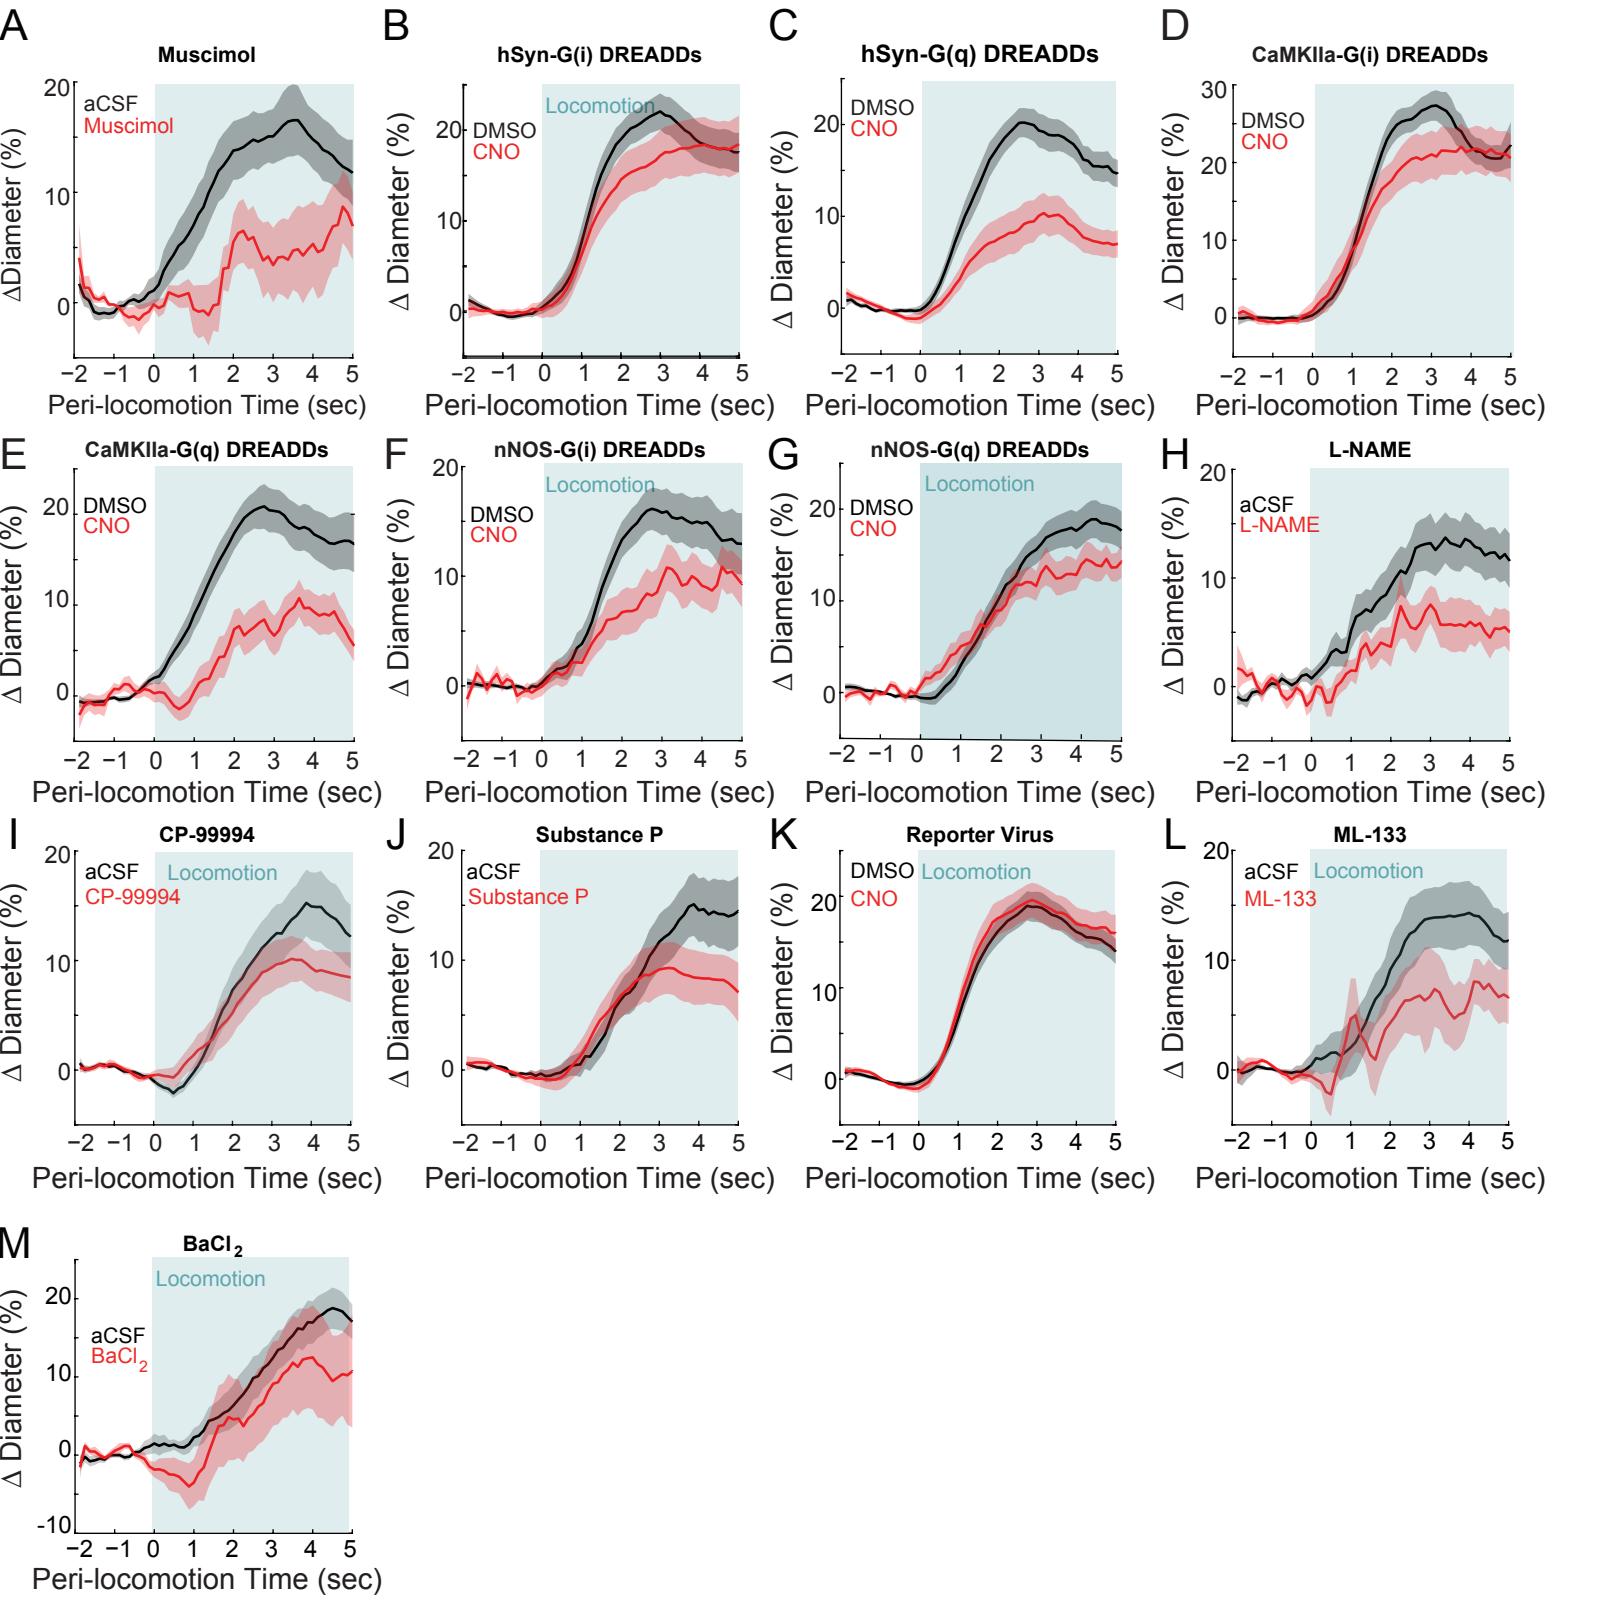

Supplement: supp [file elife_poa_e60533_Figure_8_figure_supplement_3.pdf › elife_poa_e60533_Figure_8_figure_supplement_3.pdf]
